# Supplementary material
Source: PubMed Central journal article supplement (PMC2267239)
Supplement: 7401103-s1.pdf [file 7401103-s1.pdf]

Supplementary Fig 1

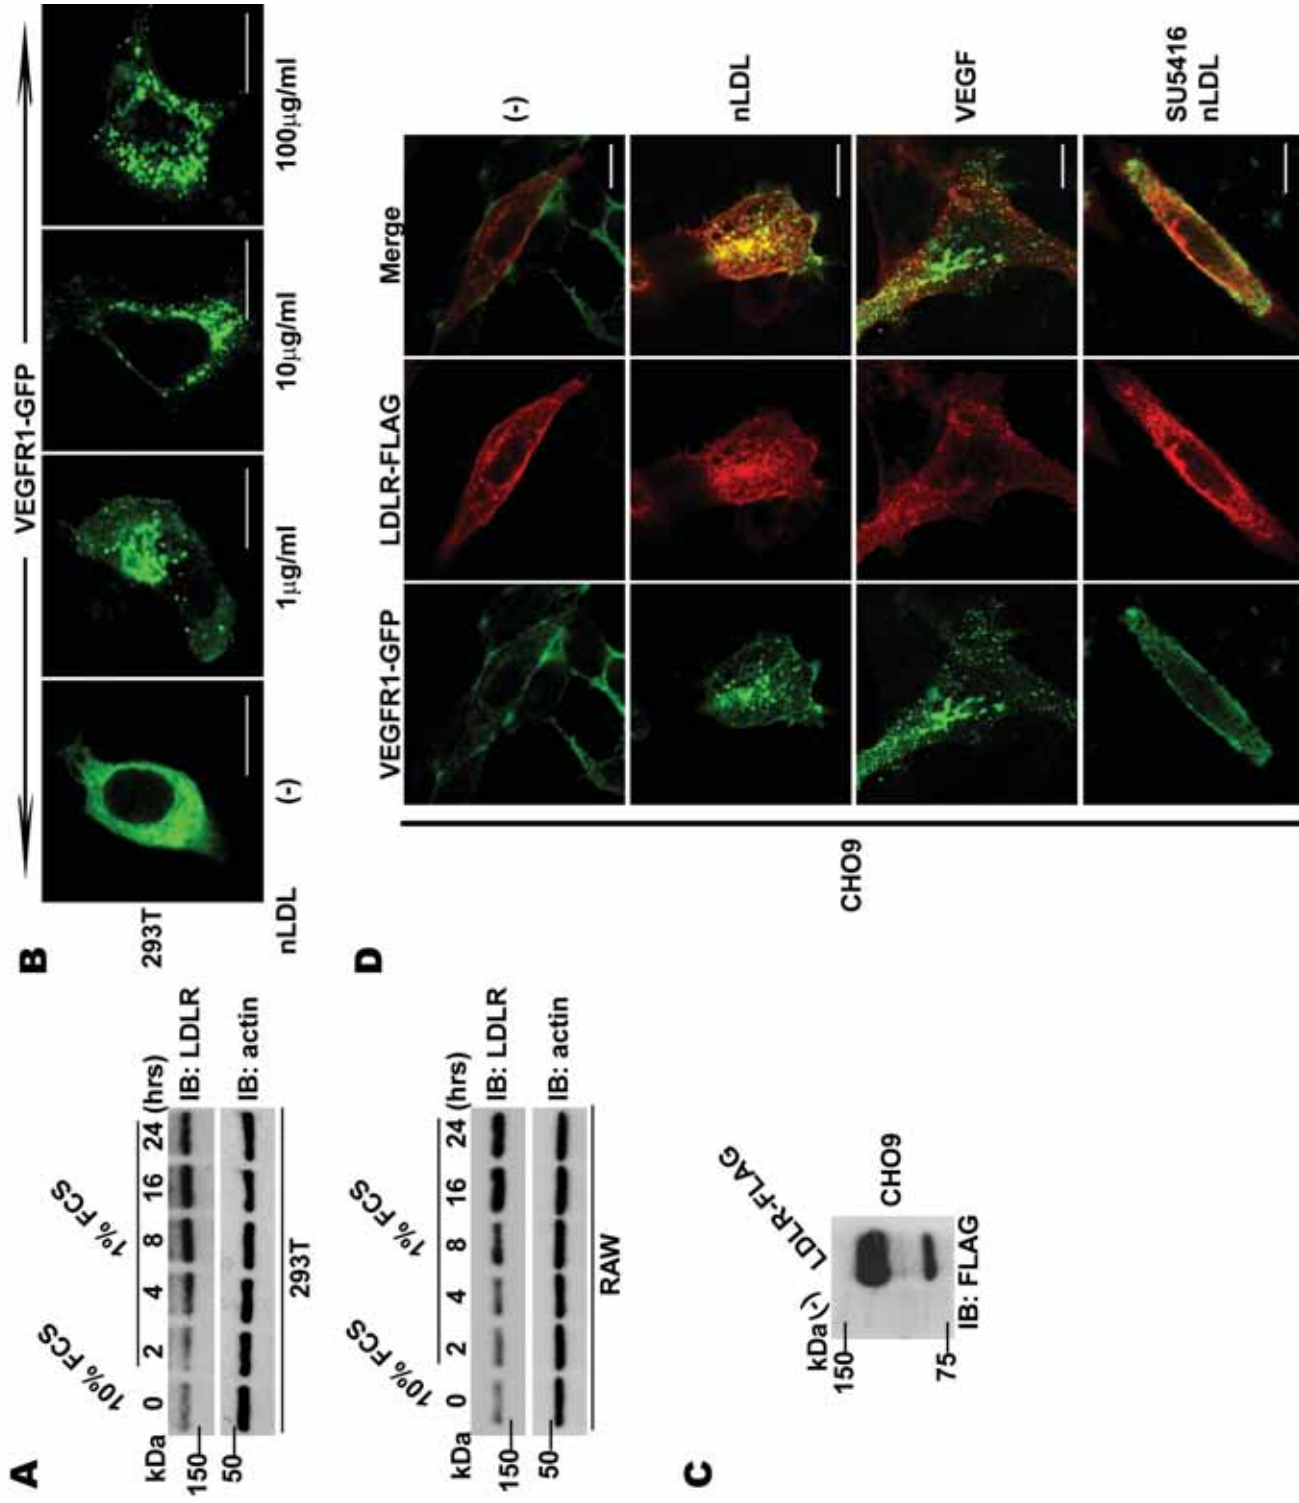

# Supplementary Fig 2

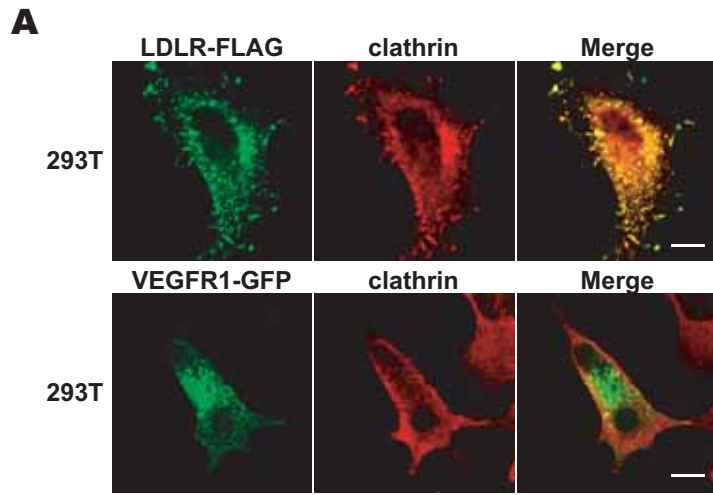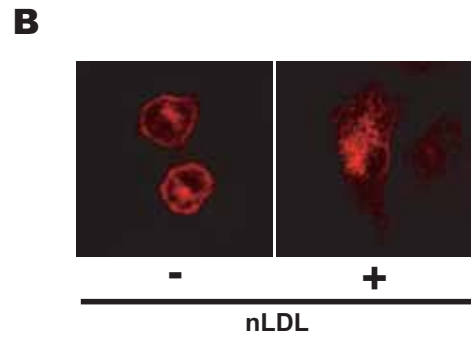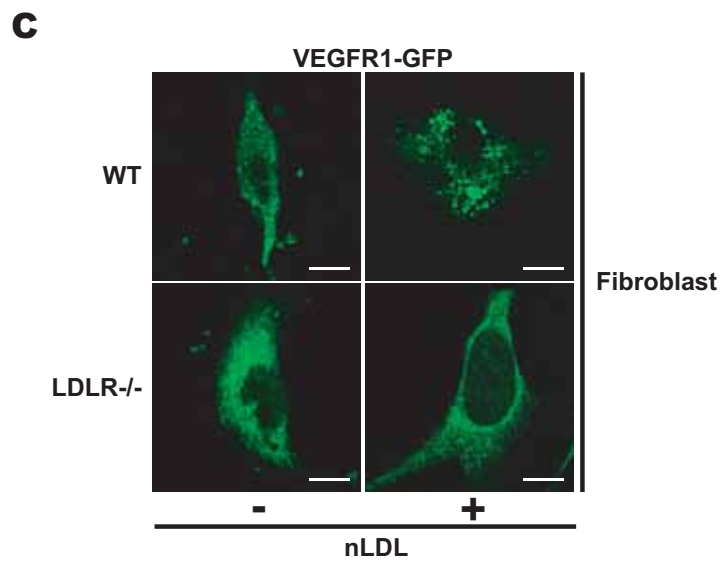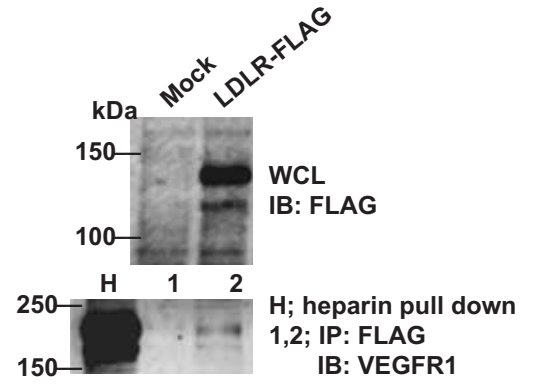

Supplementary Fig 3

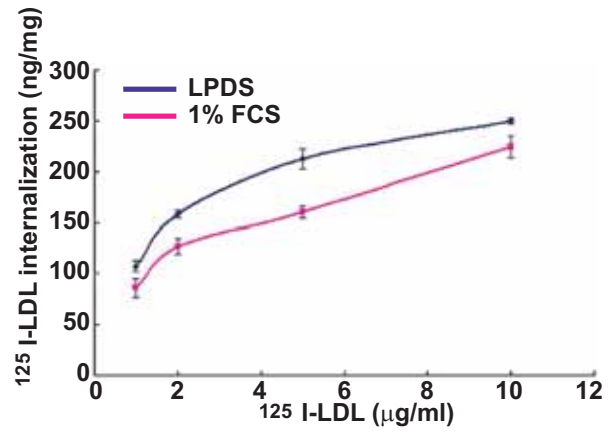

# Supplementary Fig 4

**A**

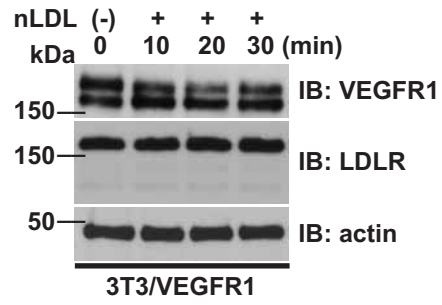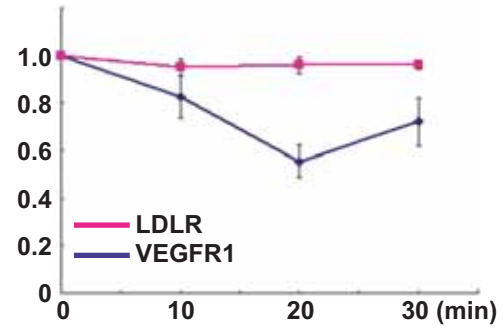

**B**

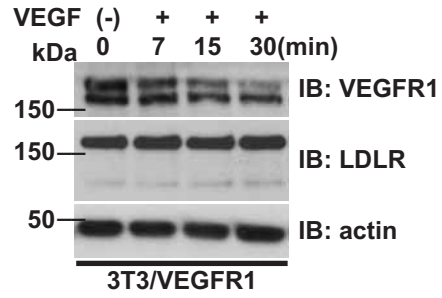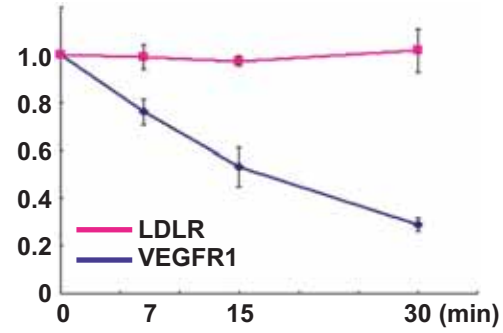

# Supplementary Fig 5

**A**

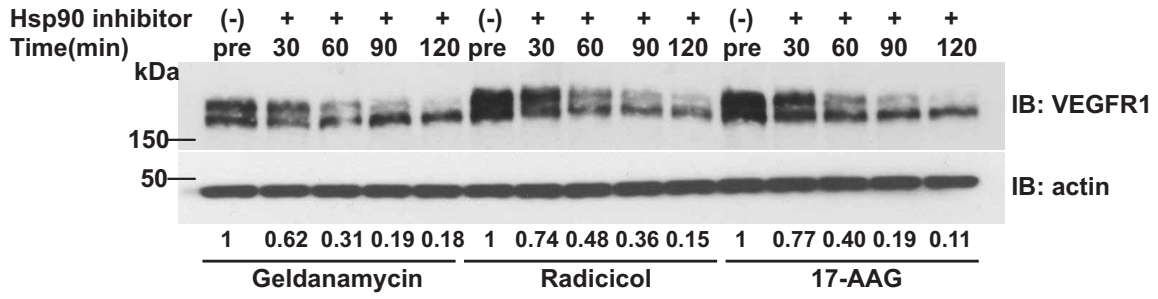

**B**

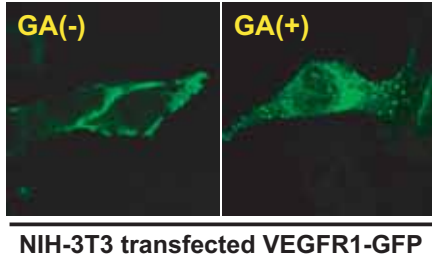

**C**

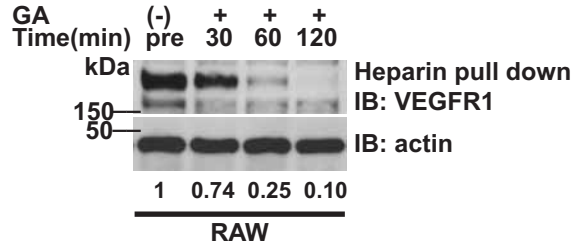

**D**

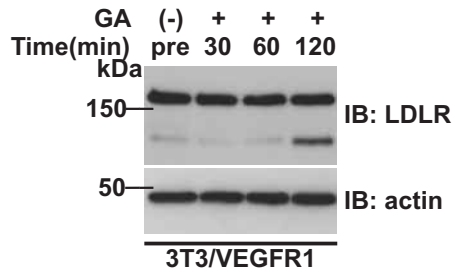

# Supplementary Fig 6

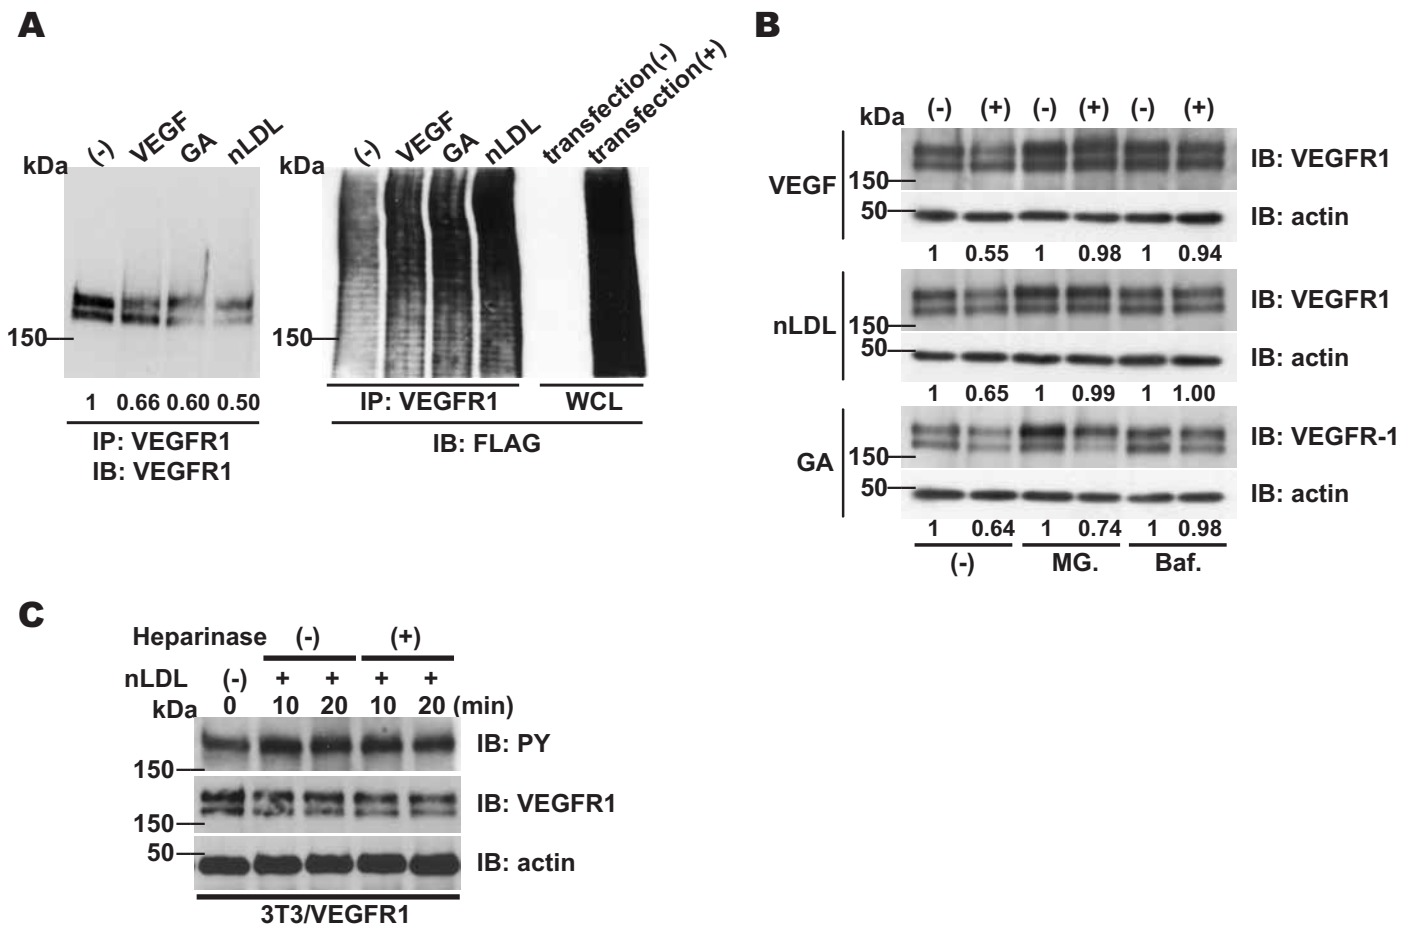

Supplementary Fig 7

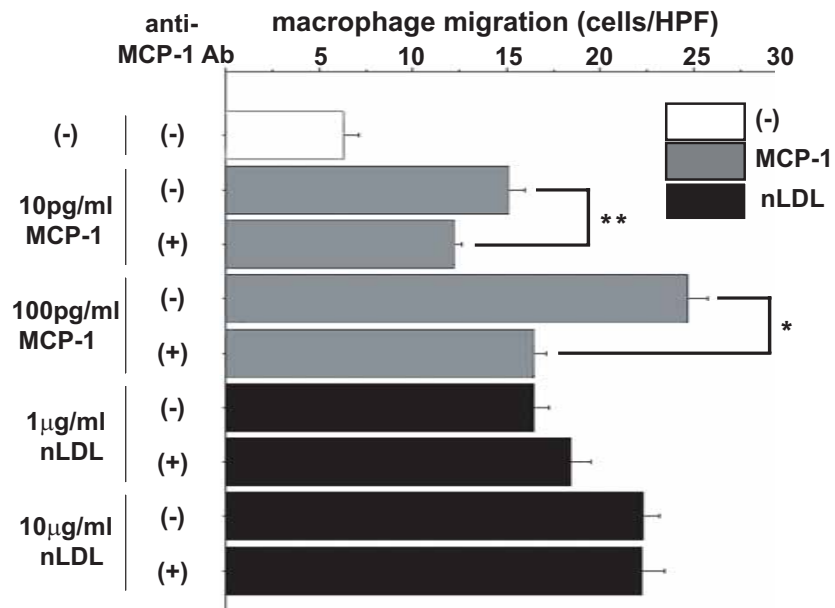

## Supplementary Table 1

| <b>Antibodies</b>                                                                               | <b>Source</b>                                             |
|-------------------------------------------------------------------------------------------------|-----------------------------------------------------------|
| anti-VEGFR1(C17)<br>anti-VEGFR2<br>anti-EGFR<br>anti-human LDLR(C7)<br>anti-clathrin            | Santa Cruz Biotechnologies, Santa Cruz, CA, USA           |
| anti-mouse VEGFR1 for IP                                                                        | Hiratsuka et al. 1998                                     |
| anti-mouse VEGFR1 N-terminus<br>anti-MCP-1<br>anti-mouse LDLR                                   | R&D systems, Minneapolis, MN, USA                         |
| anti-phosphotyrosine                                                                            | Upstate Biotechnology, Charlottesville, VA, USA           |
| anti-c-Cbl                                                                                      | Transduction Laboratories, Lexington, KY, USA             |
| anti-PLC $\gamma$<br>anti-PDGFR $\beta$                                                         | Cell Signaling Technology, Danvers, MA, USA               |
| anti-GFP                                                                                        | Invitrogen, Carlsbad, CA, USA                             |
| anti-actin                                                                                      | CHEMICON International, Temecula, CA, USA                 |
| anti-FLAG                                                                                       | Sigma, St. Louis, MO, USA                                 |
| TRITC-conjugated anti-mouse and anti-goat IgG<br>FITC-conjugated anti-rabbit and anti-mouse IgG | Jakson ImmunoResearch laboratories,<br>West Grove PA, USA |
| <b>Chemicals</b>                                                                                | <b>Source</b>                                             |
| SU5416<br>PP2                                                                                   | Calbiochem, San Diego, CA, USA                            |
| MG132<br>Bafilomycin<br>Heparinase III                                                          | Sigma, St. Louis, MO, USA                                 |
| G418                                                                                            | GIBCO, Carlsbad, CA, USA                                  |
| human native LDL<br>Dil-nLDL<br>Dil-acLDL                                                       | Biomedical Technologies, Madrid, Spain                    |
| human VEGF165                                                                                   | CHEMICON International, Temecula, CA, USA                 |
| <b>Transfection reagents(cells)</b>                                                             | <b>Source</b>                                             |
| DMRIE-C (293T)                                                                                  | Invitrogen, Carlsbad, California, USA                     |
| Effectene (RAW)                                                                                 | QIAGEN, Hilden, Germany                                   |
| Nucleofector electrophoresis system<br>(CHO9, NIH3T3, skin fibroblast)                          | Amaxa Biosystems, Gaithersburg, MD, USA                   |
| TransIT-TKO (3T3/VEGFR1)                                                                        | Mirus, Madison, WI, USA                                   |
| <b>siRNA primers</b>                                                                            | <b>Source</b>                                             |
| anti-mouse-LDLR<br>sense: GGACAGGUAGACUGUGAAAAUTT<br>anti-sense: ATTTTCACAGUCUACCUGUCCAT        | Nihon Bio Service, Saitama, Japan                         |
| anti-Nox1                                                                                       | Okamoto et al, 2006                                       |
